# Supplementary material for: Epidemiological Investigation of a Rift Valley Fever Outbreak in Humans and Livestock in Kenya, 2018
Source: PubMed Central journal article supplement (PMC7543801; doi:10.4269/ajtmh.20-0387), 2020-08-03
Supplement: tpmd200387.SD1.pdf [file tpmd200387.SD1.pdf]

# Appendix 1: Rift Valley Fever Investigation Questionnaire

## June 2018, Wajir County, Kenya – Individual questionnaire

### Section 1: Identifiers

Interview Date \_\_\_ / \_\_\_ / \_\_\_ (dd/mm/year)

Interviewer Name/Code \_\_\_

Household (HH) ID \_\_\_ - \_\_\_ (the first two digits are code for the village/center, then houses are numbered sequentially- For example the first house in Eldas should be given ID number EL-001. etc)

No. of people in the HH \_\_\_\_\_

Participant ID \_\_\_ - \_\_\_ -- \_\_\_ (first 5 digits are household ID, followed by individual's ID in household. For example, the third individual enrolled from the first house in Eldas will be EL-001-03, etc)

(a.) Person being interviewed (circle):

- |           |                          |             |                          |
|-----------|--------------------------|-------------|--------------------------|
| 1. Self   | <input type="checkbox"/> | 4. Child    | <input type="checkbox"/> |
| 2. Parent | <input type="checkbox"/> | 5. Sibling  | <input type="checkbox"/> |
| 3. Spouse | <input type="checkbox"/> | 6. Relative | <input type="checkbox"/> |

(b.) Reason for proxy interview?

- |                          |                          |
|--------------------------|--------------------------|
| 1. Person is a child     | <input type="checkbox"/> |
| 2. Person has died       | <input type="checkbox"/> |
| 3. Person is not at home | <input type="checkbox"/> |
| 4. Very ill              | <input type="checkbox"/> |

### Section 2: Personal Information

Name \_\_\_\_\_

Sex

|           |                          |
|-----------|--------------------------|
| 1. Female | <input type="checkbox"/> |
| 2. Male   | <input type="checkbox"/> |

Age (in Years) \_\_\_\_\_

Marital status

- |             |                          |
|-------------|--------------------------|
| 1. Single   | <input type="checkbox"/> |
| 2. Married  | <input type="checkbox"/> |
| 3. Divorced | <input type="checkbox"/> |
| 4. Widowed  | <input type="checkbox"/> |

Occupation

- |                      |                          |
|----------------------|--------------------------|
| 1. Formal Employment | <input type="checkbox"/> |
| 2. Herdsman/Woman    | <input type="checkbox"/> |
| 3. Housewife         | <input type="checkbox"/> |
| 4. Farmer            | <input type="checkbox"/> |
| 5. Student           | <input type="checkbox"/> |

Religion

- |                |                          |
|----------------|--------------------------|
| 1. Muslim      | <input type="checkbox"/> |
| 2. Christian   | <input type="checkbox"/> |
| 3. Traditional | <input type="checkbox"/> |

Level of education

- |             |                          |
|-------------|--------------------------|
| 1. Tertiary | <input type="checkbox"/> |
|-------------|--------------------------|

- 2. Secondary
- 3. Primary completed
- 4. Primary incomplete
- 5. No formal education
- 6. Madrassa/duksi

|  |
|--|
|  |
|  |
|  |
|  |
|  |
|  |

(i).What is your residence?

- (a.) Sub-County \_\_\_\_\_
- (b.) Ward \_\_\_\_\_
- (c.) Village \_\_\_\_\_
- d) Household Geocode : Lat : \_\_\_\_\_ Long : \_\_\_\_\_

(ii).Between the 1<sup>st</sup> May and Today have you traveled out of your village?

- 1. Yes
- 2. No

a) If yes where?

|    | Village | Ward | Sub-County | County |
|----|---------|------|------------|--------|
| 1. |         |      |            |        |
| 2. |         |      |            |        |
| 3. |         |      |            |        |

(iii).Number of days out of village between 1<sup>st</sup> May and today? \_\_\_\_\_

**Section 3: History of Illness**

- 1. Have you fallen ill between the period of 1<sup>st</sup> May and Today? (Yes/No)
- 2. If yes above, Did you have any of the following symptoms between 1<sup>st</sup> May and Today?  
If yes specify in the table below

| Symptom               | Yes | No |  | Symptom                  | Yes | No |
|-----------------------|-----|----|--|--------------------------|-----|----|
| Hotness of the Body   |     |    |  | Bloody Stool             |     |    |
| Headache              |     |    |  | Bloody Vomiting          |     |    |
| Muscle Aches          |     |    |  | Cough with blood         |     |    |
| Joint Pains           |     |    |  | Bloody vaginal discharge |     |    |
| Malaise               |     |    |  | Nose bleeding            |     |    |
| Vomiting              |     |    |  | Bleeding gums            |     |    |
| Diarrhea              |     |    |  | Skin purpura             |     |    |
| Chills                |     |    |  | Blurred vision           |     |    |
| Abdominal pain        |     |    |  | Confusion                |     |    |
| Dizziness             |     |    |  | Convulsion               |     |    |
| Miscarriage /abortion |     |    |  | Coma                     |     |    |

|          |  |  |                |  |  |
|----------|--|--|----------------|--|--|
| Jaundice |  |  | Double vision  |  |  |
|          |  |  | Blurred vision |  |  |

(i). Date of onset of illness (Fever if present) (dd/mm/year)...../...../.....

(ii). How many days did the illness last? \_\_\_\_\_ Days

(iii). Outcome status:

1. Alive   
 2. Dead

iv) If Alive is the person

1. Admitted  
 2. Discharged  
 3. In community

(v).Did you seek medical care for the illness?

1. Yes  2. No

(vi).Where did you seek for medical care? (Tick all that apply)

1. Dispensary  2. Health center  3. Hospital   
 4. Traditional healers  5. Religious healer  6. Others specify.....)

(vii).Were you admitted to the hospital/health center (sleep overnight) for this illness?

1. Yes  2. No

(viii). How long were you hospitalized?\_\_\_\_\_ (in days)

(ix).What day did you first seek treatment (dd/mm/year)...../...../.....

(x).Were you tested for malaria? Yes/No

(xi) If yes, what were the results? 1-Positive 2-Negative 3-Don't know

**Section 4: Exposure Details: Period of Interest (between the 1<sup>st</sup> May and Date of interview)**

(i). Did you consume or handle any meat, milk, blood from any **sick** animal between 1<sup>st</sup> May and today (date of interview)?

1. Yes  2. No

(ii). If Yes which **sick** animal (Tick)?

1. Sheep  2. Goat  3.Cows   
 4. Camels  5. Donkeys  6. Others, specify  \_\_\_\_\_

**(iii)Specifically concerning the SICK/dead animal, did you do any of the following?**

|  |      | Sheep    | Goats    | Camel    | Cow      |
|--|------|----------|----------|----------|----------|
|  | Yes/ | How many | How many | How many | How many |
|  |      |          |          |          |          |

|                                                 | No | times | times | times | times |
|-------------------------------------------------|----|-------|-------|-------|-------|
| <b>Slaughter</b>                                |    |       |       |       |       |
| <b>Skinning</b>                                 |    |       |       |       |       |
| <b>Herding (# days)</b>                         |    |       |       |       |       |
| <b>Sleeping with herd (# nights)</b>            |    |       |       |       |       |
| <b>Milking</b>                                  |    |       |       |       |       |
| <b>Touch blood or tissue</b>                    |    |       |       |       |       |
| <b>Assisted animals during birth/abortion</b>   |    |       |       |       |       |
| <b>Touch/handled aborted fetus/still births</b> |    |       |       |       |       |
| <b>Handle animal dung</b>                       |    |       |       |       |       |
| <b>Consumed meat</b>                            |    |       |       |       |       |
| <b>Involved in preparing meat</b>               |    |       |       |       |       |
| <b>Consumed raw milk</b>                        |    |       |       |       |       |
| <b>Contact with hides and skins</b>             |    |       |       |       |       |
| <b>Treating sick animal</b>                     |    |       |       |       |       |

(iv). If you were not involved in these activities, were you within 5 meters during any of these activities on SICK animals?

1. Yes  2. No  3. Don't Know

(v). Between the 1<sup>st</sup> May and today, how many nights did you sleep outdoors? \_\_\_\_\_

(vi). How many nights did you sleep in the bush? \_\_\_\_\_

(ix). How much of the day did you spend outside between 1<sup>st</sup> May to date (not including sleeping)?

1. All day (dawn to dusk)  2. Most of day  3. Few hours

(x). Do you have a bednet? 1. Yes  2. No

(xii). When was the ITN last treated?

1. Never treated  2. Within 1- 3 months ago   
3. 3 – 12 months ago  4. Over 12 months ago

(xiii). Between 1<sup>st</sup> May and today, did you sleep under bednet?

1. Every Night  2. Some Nights  3. Never

(xiv). Did you use any mosquito repellants in between 1<sup>st</sup> May and today?

1. Yes  2. No

(xviii). Did you spray or anyone else (MOH staff) spray (with insecticides) your house

between 1<sup>st</sup> May and today?

1. Yes  2. No

(xix) Between 1<sup>st</sup> May and today, how many mosquitoes do you remember seeing outside/inside your house?

1. A lot/More than normal  2. Some/Normal amount  3. Few/Less than normal

(xx) Between 1<sup>st</sup> May and today, are there other people in this household who have become sick after consumption or contact with sick/dead animal meat, milk and blood? Yes/No

(xxi) If yes, how many?-----

### Section 5: RVF Knowledge Assessment

(xix).Have you ever heard of Rift Valley Fever before the current outbreak?

1. Yes  2. No

(xx) If Yes, from whom?

a) Health care workers (b) radio (c) Television (d) community leaders (e) Barazas (f) family (g) neighbors/friends (h) schools

(xxi) Do you know what causes RVF? Yes/No

(xxii) If yes, how does one get RVF? (mark all that apply)

(a) Mosquito bites (b) Eating undercooked meat from a sick animal (c) drinking raw milk from a sick animal (d) slaughtering/skinning sick animals (e) handling abortus (f) assisting animal delivery of a sick animal (g) milking sick animals (h) contact with blood of a sick animal

(xxiii) Do you know the signs and symptoms of RVF virus disease in humans?

1. Yes  2. No

(xxiv) If yes, what are the signs and symptoms? (mark all that apply)

| Symptom               | Symptom                  |  |
|-----------------------|--------------------------|--|
| Hotness of the Body   | Bloody Stool             |  |
| Headache              | Bloody Vomiting          |  |
| Muscle Aches          | Cough with blood         |  |
| Joint Pains           | Bloody vaginal discharge |  |
| Malaise               | Nose bleeding            |  |
| Vomiting              | Bleeding gums            |  |
| Diarrhea              | Skin purpura             |  |
| Chills                | Blurred vision           |  |
| Abdominal pain        | Confusion                |  |
| Dizziness             | Convulsion               |  |
| Miscarriage /abortion | Coma                     |  |
| Jaundice              | Double vision            |  |
|                       | Blurred vision           |  |

(xxv) Do you think RVF is preventable? (Yes/No)

(xxvi) If Yes, How is it preventable? (Mark all that apply)

|                                                      |  |
|------------------------------------------------------|--|
| Vaccination of animals                               |  |
| Use of mosquito Nets                                 |  |
| Avoid consuming uninspected meat/raw milk            |  |
| Use protective equipment when handling aborted fetus |  |
| Avoid contact with fluids from sick animals          |  |
| Drain stagnant waters/clearing bushes                |  |

**END**
